**A-955** Room A, 10/17/2000 2:00 PM - 4:00 PM (PS)  
**Dissatisfaction with Postoperative Pain Therapy by an Anesthesiology-Based Pain Service Vs. Nonstandardized Pain Therapy. A Prospective Quality Assurance Study** Walter Rotb, MD; Juergen Jage, MD; Hans-Juergen Hennes, MD; Arno Depta, MD, Department of Anesthesiology, University Hospital, Mainz, Germany

**A-956** Room A, 10/17/2000 2:00 PM - 4:00 PM (PS)  
**Pretreatment of Lidocaine Does Not Prevent the Spinal Sensitization Induced by Chronic Morphine** Yoji Saito, MD; Yumiko Kirihara, DVM; Katsushi Doi, MD; Shinichi Sakura, MD, Dept of Anesthesiology, Sbitmane Medical University, Izumo, Japan. The pretreatment of lidocaine does not reduce the spinal sensitization induced by chronic morphine.

**A-957** Room A, 10/17/2000 2:00 PM - 4:00 PM (PS)  
**No Cross-Tolerance between Synovial Opioid Peptides and Intraarticular Morphine Analgesia** Michael Schafer, MD; Rudolf Likar, MD; Gudrun Philippitsch, MD; Wolfgang Koppert, MD; Christoph Stein, MD, Anesthesiology and Intensive Care Medicine, Freie Universitat Berlin, Berlin, Germany. No shift in dose-dependent i.a. morphine analgesia with more immune and  $\beta$ -END cells.

**A-958** Room A, 10/17/2000 2:00 PM - 4:00 PM (PS)  
**PCA with Tramadol Versus Morphine: Results of a Multicenter Study** Guido K. Schuepfer, MD; Rene Bader, MD; Andre Hagebecker, MD; Joachim Schmeck, MD PD; Christoph J. Konrad, MD, Anesthesiology, Kantonsspital, Lucerne, Switzerland. PCA using Tramadol offers clinical advantages compared to morphine.

**A-959** Room A, 10/17/2000 2:00 PM - 4:00 PM (PS)  
**Analysing the Pain Score in the PACU: A Critique** Jagdip B. Shab, M.D.; Hao Wang, M.D.; Carlos U. Arancibia, M.D., Anesthesiology, Medical College of Virginia, Richmond, VA, United States. Pain is a dynamic syndrome in PACU. Pain score provides quantifying numbers but may seriously disregard quality aspect of pain. Number of pain treatments is a pivotal factor for duration of PACU stay.

**A-960** Room A, 10/17/2000 2:00 PM - 4:00 PM (PS)  
**Epidural Hydromorphone with Bupivacaine (0.031%) for Pain Control Following Thoracic Surgery: Lumbar Vs. Thoracic Administration** Raymond Sinatra, MD PhD; Carlos A. Ocampo, MD; Thomas Denker, MD; Martha Luther, RN MS, Anesthesiology, Yale University School of Medicine, Yale-New Haven Hospital, New Haven, CT, United States. Thoracic epidural hydromorphone offers superior pain control.

**A-961** Room A, 10/17/2000 2:00 PM - 4:00 PM (PS)  
**Analgesic Efficacy of Continuous Infusion with Dipyron and Tramadol in Postoperative Pain** Anna Spacek, MD; Elwira Goraj, MD; Franz X. Neiger, MD; Jerzy Jarosz, MD; Hans G. Kress, MD, Anesthesiology B, University of Vienna, Vienna, Austria. The combination of the two drugs with different analgesic properties and mechanisms but similar pharmacokinetics provides better effect than tramadol alone.

**A-962** Room A, 10/17/2000 2:00 PM - 4:00 PM (PS)  
**Temperature Dependency of Ectopic Discharges from Chronically Compressed Sensory Neurons in the Rat** Jun-Ming Zhang, M.S., M.D.; Huiqing Li, M.D.; Bao-Gang Liu, M.D., Ph.D.; Sorin J. Brull, M.D., Anesthesiology, Univ of Arkansas for Medical Sciences, Little Rock, AR, United States. Action potential characteristics and spontaneous activity from normal and injured sensory neurons are highly temperature sensitive.

### Local Anesthesia: Pain - Clinical I

**A-963** Room 310, 10/17/2000 10:30 AM - 12:00 PM (PD)  
**Insertion of Intradermal Needles into Trigger Points Provides Analgesia for Intractable Abdominal Scar Pain** Naoki Kotani, M.D.; Hiroshi Hashimoto, M.D.; Akiko Suzuki, M.D.; Masatoshi Muraoka, M.D.; Akitomo Matsuki, M.D., Anesthesiology, University of Hiroasaki, Hiroasaki, Aomori-ken, Japan. Intradermal needles into trigger points provided marked analgesia for abdominal intractable painful scars.

**A-964** Room 310, 10/17/2000 10:30 AM - 12:00 PM (PD)  
**An Investigation of the Use of a Tramadol Infusion for Post-Thoracotomy Pain Relief: A Comparison with Epidural Morphine** Robert A. Dyer, FCA(SA); Mark B. Bloch, FCA(SA); Sylvia A. Heijke, FCA(SA); Michael F. James, PhD, Anaesthesia, Groote Schuur Hospital, Cape Town, South Africa. Intravenous tramadol is as effective as epidural morphine and better than PCA morphine for postoperative analgesia after lung resection.

**A-965** Room 310, 10/17/2000 10:30 AM - 12:00 PM (PD)  
**Epidural PCA Hydromorphone (0.01 mg/mL) Alone or Combined with Bupivacaine (0.031%) for Postoperative Analgesia: Experience in 2,560 Patients** Raymond Sinatra, MD; Ferne Sevarino, MD; Carlos A. Ocampo, MD; Mary Dudley, APRN; Elissa Mastrangelo, RN MS, Anesthesiology, Yale University School of Medicine, Yale-New Haven Hospital, New Haven, CT, United States. PCEA hydromorphone provides effective analgesia.

**A-966** Room 310, 10/17/2000 10:30 AM - 12:00 PM (PD)  
**Cognitive and Motor Effects of Morphine and Hydromorphone at Equianalgesic Plasma Concentrations** Barbara A. Coda, MD; Karen L. Syrjala, PhD; Sari Rotb-Roemer, PhD; Danny D. Shen, PhD; Danny Shen, PhD, Anesthesiology, Univ. of Washington and Fred Hutchinson Cancer Research Ctr., Seattle, WA, United States. During morphine and hydromorphone infusions, some but not all cognitive and motor functions decreased.

**A-967** Room 310, 10/17/2000 10:30 AM - 12:00 PM (PD)  
**Epidural Sustained-Release Morphine (SKY0401) for Pain Management Following Hip Surgery under General Anesthesia** Maximilian W.B. Hartmannsgruber, MD; Edward T. Riley, MD; Gavin Martin, MD; Craig T. Hartrick, MD; Robin L. Allgren, MD, PhD, Anesthesiology, Yale University School of Medicine, New Haven, CT, United States. A single preop epidural dose of SKY0401 reduced postop pain and fentanyl usage.

**A-968** Room 310, 10/17/2000 10:30 AM - 12:00 PM (PD)  
**Impact of Baricity on the Analgesic and Ventilatory Effects of Intrathecal Sufentanil in Volunteers** Fazeela Ferouz, MD; Mark C. Norris, MD; Musa M. Aner, MD; Martin J.R. Hortalez, MD, Department of Anesthesiology, St. Luke's-Roosevelt Hospital Center, New York, NY, United States. Sufentanil/dextrose produces less analgesia but the same ventilatory effects as sufentanil/saline.
